# Supplementary material
Source: PubMed Central journal article supplement (PMC2656937)
Supplement: NIHMS92001-supplement-1.pdf [file NIHMS92001-supplement-1.pdf]

## **Supplemental Figure 1      Structural Alignment of HIV-1, ASV, and MPMV IN**

A structural alignment of HIV-1, ASV and MPMV integrases (Snasel, Krejcik et al. 2005) was used to identify amino acid residues near the LTR DNA ends in the structural model that were unique at structurally conserved positions. The residues from this analysis are in addition to those that were previously studied (Chen, Weber et al. 2006). Residues highlighted in blue and green were analyzed by Aiping Chen while those highlighted in yellow were analyzed by James Dolan. HIV-1 IN chimeras were assembled by substitution of the ASV amino acid residue into the structurally related position of HIV-1 IN and assayed for 3' processing as described in the Materials and Methods.

|        |             |             |            |            |           |                   |
|--------|-------------|-------------|------------|------------|-----------|-------------------|
|        | 1           | 10          | 20         | 30         | 40        |                   |
| hivin  | --FLDGIDKAQ | EEHEKYHSNWR | AMASDFNLPP | VVAKEIVA   | SCDKCQ    | LKLG              |
| asvin  | -----PLRE   | AKDLHTALHIG | PRALSKACNI | SMQQAREVVQ | TCPHCN    | SAP               |
| mpmvin | SNINTNLESAQ | NAHTLHHLNAQ | TLRLMFNI   | PREQARQIVK | QCPTCV    | TYL               |
|        | 50          |             |            |            |           |                   |
| hivin  | EAMH-GQV--  | DCSP-       |            |            |           |                   |
| asvin  | ALEA-GVNPR  | GLGPL       |            |            |           | N-TERMINAL DOMAIN |
| mpmvin | PVPHLGVNPR  | GLFPN       |            |            |           |                   |
|        | 60          | 70          | 80         | 90         | 100       |                   |
| hivin  | GIWQLDCTH   | LE--G--KVI  | LVAHVVASGY | IEAEVIPAET | GQETAYFL  | LKLAGRW           |
| asvin  | QIWQTDFTL   | EPMAPRSWV   | AVTVDTASSA | IVVTQHGRV  | TSVAAQHH  | WATAIAVL          |
| mpmvin | MIWQMDVTH   | YSEFGNLKYI  | HVSIDTFSG  | FLLATLQTG  | ETTKHVITH | LLHCFSII          |
|        | 110         | 120         | 130        | 140        | 150       | 160               |
| hivin  | -PVKTVHTD   | NGSNFTSTT   | VKAACWWAG  | IKQEFGIPY  | NPQSQGVIE | SMNKELKKI         |
| asvin  | GRPKAIKTD   | NGSCFTSK    | STREWLARW  | GIAHTTGIP  | GPSQGMVER | ANRLLKDR          |
| mpmvin | GLPKQIKTD   | NGPGYTSK    | NFQEF CSTL | QIKHITGIP  | YPNPGQGIV | ERAHL SLKTT       |
|        | 170         | 180         | 190        |            |           |                   |
| hivin  | IGQVR--DQAE | -----HLKT   | AVQMAVFIH  | NFKRKG     | GIGGY     |                   |
| asvin  | IRVLAEGDGF  | MKRIPTSKQ   | GELLAKAMY  | ALNHFER    | GENTK-    | CATALYTIC         |
| mpmvin | IEKIKKGEWY  | PRK---GTP   | RNILNHALF  | ILNFLNLD   | DDQNK-    | CORE DOMAIN       |
|        | 200         | 210         | 220        |            |           |                   |
| hivin  | SAGERIVDI   | IATDIQTK    | ELQKQITKI  |            |           |                   |
| asvin  | TPIQKHW     | RPTVLT----- |            |            |           |                   |
| mpmvin | SAADRFW     | HNNPKK----- |            |            |           |                   |
|        | 230         | 240         | 250        | 260        | 270       |                   |
| hivin  | QNFRVY      | YRDSRDPV    | WKGP       | AKLLWK     | GEGAVVIQD | N-SDIKV           |
| asvin  | EGPPVK      | IRIET-GE    | WEKGNV     | LVWGRGYA   | AVKNRD    | TDKVIW            |
| mpmvin | QFAMV       | KWKDPLD     | NTWHGPD    | PVLIWGR    | GSVCVYSQ  | TYDAAR            |
|        |             |             |            |            |           | WLPRLV            |
| hivin  | YGKQ        | MAGDD-----  | CVASR----- | QDED       |           | C-TERMINAL DOMAIN |
| asvin  | QKDEV       | TKKDEAS     | PLFAGSSD   | WIPWGDEQ   | EGLQEEA   | ASNKQEGP          |
| mpmvin | NN---       | QSRE        |            |            |           | GEDTLAANES        |
